# Supplementary material
Source: PubMed Central journal article supplement (PMC5983324)
Supplement: jci-128-98224-s152.pdf [file jci-128-98224-s152.pdf]

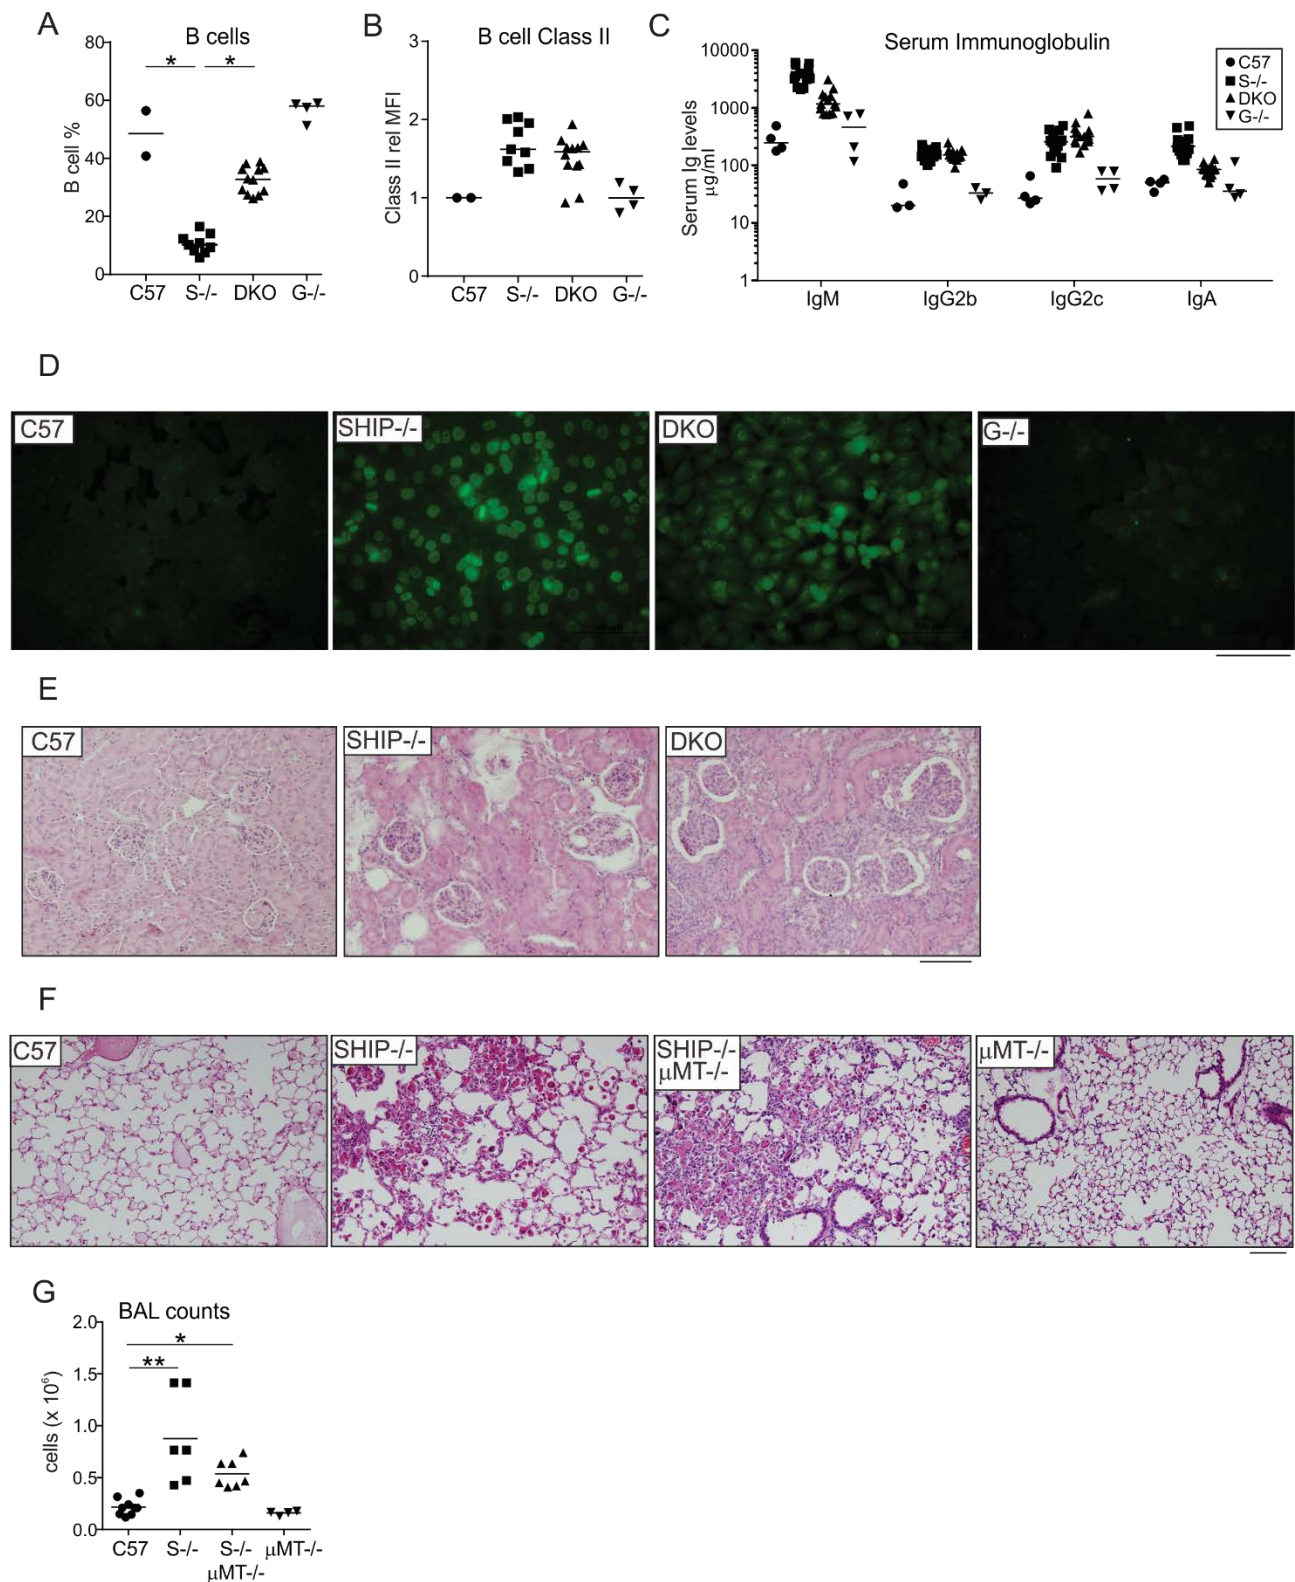

912

913 **Supplemental Figure 1. G-CSF-deficiency does not alter B cell abnormalities and autoimmune**

914 **disease development in SHIP-1<sup>-/-</sup> mice, and B cell-deficient SHIP-1<sup>-/-</sup> mice still develop lung**

915 **pathology. (A) Splenic B cell frequency of the indicated 12-week-old mice determined by flow**

916 **cytometry using anti-mouse B220; n = 2-12 per group, pooled data from 2 experiments. C57 =**

917 C57BL/6, S<sup>-/-</sup> = SHIP-1<sup>-/-</sup>, G<sup>-/-</sup> = G-CSF<sup>-/-</sup>. **(B)** Normalized MFI values of MHC Class II expression  
918 on B cells from the indicated 12-week-old mice measured by flow cytometry; n= 2-12 per group,  
919 pooled data from 2 experiments. **(C)** Serum immunoglobulins of the indicated isotypes measured by  
920 ELISA from the indicated 12-week-old mice; n = 3-14 per group, pooled from 2 experiments. **(D)**  
921 Immunofluorescence of HEp-2 slides stained with sera from the indicated mice detected with anti-  
922 mouse IgG (H+L). Images are representative of 2-4 mice per group in one experiment. **(E)**  
923 Hematoxylin and Eosin-stained sections of kidneys from the indicated 30-week-old mice, scale bar  
924 indicates 100  $\mu$ m. Images are representative of 5-10 mice per group. **(F)** Hematoxylin and Eosin-  
925 stained sections of lungs from the indicated 7-13 week-old mice, scale bar indicates 100  $\mu$ m. Images  
926 are representative of 4-9 mice per group. **(G)** BAL counts from the indicated 7-13 week-old mice,  
927 n=4-9 per group, pooled from 2 experiments. Data in A and G analyzed by ANOVA, \*, p < 0.05. \*\*,  
928 p < 0.01.

929 Supplemental Table 1: Characteristics of patients included in the study

|                            | <b>Non Smokers/No COPD</b> | <b>Smokers/No COPD</b> | <b>Smokers/COPD</b>  |
|----------------------------|----------------------------|------------------------|----------------------|
| Sex, M/F                   | 3M/7F                      | 6M/4F                  | 4M/5F                |
| Age in yrs., Mean $\pm$ SD | 67.5 $\pm$ 11.78           | 61.8 $\pm$ 10.76       | 71.44 $\pm$ 10.91    |
| (range), Median            | (50-89), 71.5              | (45-81), 58            | (48-89), 72          |
| FEV1, % reference          | 83.57 $\pm$ 13.56          | 89.14 $\pm$ 25.51      | 65.13 $\pm$ 27.39    |
| FEV1/FVC, %                | 77.71 $\pm$ 6.63           | 71.57 $\pm$ 11.86      | 54.38 $\pm$ 11.48    |
| Smoking status             | 10 never-smoker            | 6 former / 4 current   | 7 former / 2 current |
| Lung cancer diagnosis      | 40% (4/10)                 | 60% (6/10)             | 78% (7/9)            |
